# Supplementary material for: Cu Nanoparticles Modified Step-Scheme Cu2O/WO3 Heterojunction Nanoflakes for Visible-Light-Driven Conversion of CO2 to CH4
Source: MDPI journal article supplement (doi:10.3390/nano12132284), 2022-07-02
Supplement: s1 [file s1]

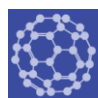

## Supplementary Material

# Cu Nanoparticles Modified Step-Scheme Cu<sub>2</sub>O/WO<sub>3</sub> Heterojunction Nanoflakes for Visible-Light-Driven Conversion of CO<sub>2</sub> to CH<sub>4</sub>

Weina Shi <sup>1</sup>, Ji-Chao Wang <sup>2,3,\*</sup>, Aimin Chen <sup>1</sup>, Xin Xu <sup>1</sup>, Shuai Wang <sup>1</sup>, Renlong Li <sup>2</sup>, Wanqing Zhang <sup>2</sup> and Yuxia Hou <sup>2,\*</sup>

<sup>1</sup> School of Chemistry and Materials Engineering, Xinxiang University, Xinxiang 453000, China; shiweina516@163.com (W.S.); chenaimin1978@163.com (A.C.); xuxin202111@163.com (X.X.); wangshuai00129@163.com (S.W.)

<sup>2</sup> College of Chemistry and Chemical Engineering, Henan Institute of Science and Technology, Xinxiang 453000, China; rlli@hist.edu.cn (R.L.); zhangwqzzu@163.com (W.Z.)

<sup>3</sup> College of Chemistry, Zhengzhou University, Zhengzhou 450000, China

\* Correspondence: wangjichao@hist.edu.cn (J.-C.W.); yxhou@163.com (Y.H.); Tel.: +86-0373-304-0418 (J.-C.W. & Y.H.)

## S1. Catalytic Experiment for CO<sub>2</sub> Photoreduction

Photocatalytic activity for CO<sub>2</sub> reduction with water vapor was evaluated in a stainless-steel cylindrical vessel with a length of 15 cm and a volume of 180 mL, and the light source was a 300 W Xenon arc lamp (PLS-SXE 300, Beijing Trust tech Co. Ltd., China) with a UV cutoff filter ( $\lambda > 400$  nm). The catalyst was put on a glass sheet (1.8 × 2 cm) equipped with a quartz window. Before lighting, the reaction setup was vacuum-treated, and then high purity CO<sub>2</sub> gas (99.995%) was purged into the reaction system several times. The compressed high purity CO<sub>2</sub> gas passed through a water bubbler to generate a mixture of CO<sub>2</sub> and H<sub>2</sub>O vapor. After illumination, the gaseous products were quantifiably identified by offline analysis using a GC-7890II gas chromatograph (Techcomp Corp., China) equipped with FID and TCD detectors, and the columns were TDX-01 and Porapak-Q, respectively. Then, the hydrocarbon product was further analyzed by GC-MS (Agilent 7890A-5975C) equipped with a DB-FFAP capillary column. In order to evaluate the stability of the synthesized composites, the Cu/Cu<sub>2</sub>O/WO<sub>3</sub> model sample was refreshed by electrochemical treatment before washing and drying, and its photocatalytic performance was reassessed.

**Table S1.** ICP-AES analysis of Cu<sub>2</sub>O/WO<sub>3</sub> and Cu/Cu<sub>2</sub>O/WO<sub>3</sub> samples.

| Sample                               | Ratio of Cu/W atoms (%) |
|--------------------------------------|-------------------------|
| WO <sub>3</sub>                      | 0.00                    |
| Cu <sub>2</sub> O/WO <sub>3</sub>    | 16.66                   |
| Cu/Cu <sub>2</sub> O/WO <sub>3</sub> | 18.22                   |
| Cu/Cu <sub>2</sub> O                 | 100                     |
| Cu <sub>2</sub> O                    | 100                     |

**Table S2.** Band gaps of pure WO<sub>3</sub>, Cu<sub>2</sub>O, Cu<sub>2</sub>O/WO<sub>3</sub> and Cu/Cu<sub>2</sub>O/WO<sub>3</sub> samples.

| Sample                               | Band gap( eV ) |
|--------------------------------------|----------------|
| WO <sub>3</sub>                      | 2.83           |
| Cu <sub>2</sub> O/WO <sub>3</sub>    | 2.32*          |
| Cu/Cu <sub>2</sub> O/WO <sub>3</sub> | 2.09*          |
| Cu <sub>2</sub> O                    | 2.03           |

\* The above value was apparent band gap of the sample.

**Table S3.** Comparison of performance CO<sub>2</sub> conversion of the obtained material with other reported catalysts.

| Catalyst                                                             | Experimental Conduction                                        | Performance                                                                                                                                                                                                                   | Reference                                  |
|----------------------------------------------------------------------|----------------------------------------------------------------|-------------------------------------------------------------------------------------------------------------------------------------------------------------------------------------------------------------------------------|--------------------------------------------|
| Cu/Cu <sub>2</sub> O/g-C <sub>3</sub> N <sub>4</sub>                 | 300W Xe lamp                                                   | CO: 10.8 $\mu\text{mol/g}_{\text{cat}}/\text{h}$<br>CH <sub>4</sub> : 3.1 $\mu\text{mol/g}_{\text{cat}}/\text{h}$<br>CH <sub>4</sub> /CO: 0.29                                                                                | Carbon, 2022, 193, 272-284.                |
| Cu/CuO <sub>x</sub> /TiO <sub>2</sub>                                | 56 mW/cm <sup>2</sup> LED (425 nm)                             | CO: 0.7 $\mu\text{mol/g}_{\text{cat}}/\text{h}$<br>CH <sub>4</sub> : 1.2 $\mu\text{mol/g}_{\text{cat}}/\text{h}$<br>CH <sub>4</sub> /CO: 1.71                                                                                 | Nanomaterials, 2022, 12, 1584.             |
| Cu-Ti <sub>3</sub> C <sub>2</sub> Tx/g-C <sub>3</sub> N <sub>4</sub> | 300W Xe lamp (170 mW/cm <sup>2</sup> , 400nm cutoff filter)    | CO: 1225.5 $\mu\text{mol/g}_{\text{cat}}/\text{h}$<br>CH <sub>4</sub> : 90 $\mu\text{mol/g}_{\text{cat}}/\text{h}$<br>CH <sub>4</sub> /CO: 0.07                                                                               | Chem. Eng. J., 2022, 446, 137028.          |
| 1%CuO <sub>x</sub> /TiO <sub>2</sub> (101)                           | 300 W Xe lamp                                                  | CO: 0.32 $\mu\text{mol/g}_{\text{cat}}/\text{h}$<br>CH <sub>4</sub> : 2.29 $\mu\text{mol/g}_{\text{cat}}/\text{h}$<br>CH <sub>4</sub> /CO: 7.15<br>H <sub>2</sub> : 2.96 $\mu\text{mol/g}_{\text{cat}}/\text{h}$              | Appl. Surf. Sci., 2021, 564, 150407.       |
| Cu <sub>2</sub> O/Ti <sub>3</sub> C <sub>2</sub> Tx                  | 300 W Xe lamp                                                  | CO: 17.55 $\mu\text{mol/g}_{\text{cat}}/\text{h}$<br>CH <sub>4</sub> : 0.96 $\mu\text{mol/g}_{\text{cat}}/\text{h}$<br>CH <sub>4</sub> /CO: 0.05                                                                              | Appl. Surf. Sci., 2021, 542, 148685.       |
| Cu <sub>2</sub> O@Cu <sub>3</sub> (BTC) <sub>2</sub>                 | 500 W Xe lamp (400nm cutoff filter), Thin film on copper mesh  | CO: 0.73 $\mu\text{mol}$ for 8h                                                                                                                                                                                               | Angew. Chem. Int. Ed., 2021, 6, 8455-8459. |
| Cu/Cu <sub>2</sub> O/WO <sub>3</sub>                                 | 300 W Xe lamp (170 mW/cm <sup>2</sup> , 400nm cutoff filter, ) | After 24 h illumination<br>CH <sub>4</sub> : 101.2 $\mu\text{mol/g}_{\text{cat}}/\text{h}$<br>H <sub>2</sub> : 13.3 $\mu\text{mol/g}_{\text{cat}}/\text{h}$<br>O <sub>2</sub> : 143.7 $\mu\text{mol/g}_{\text{cat}}/\text{h}$ | This work                                  |

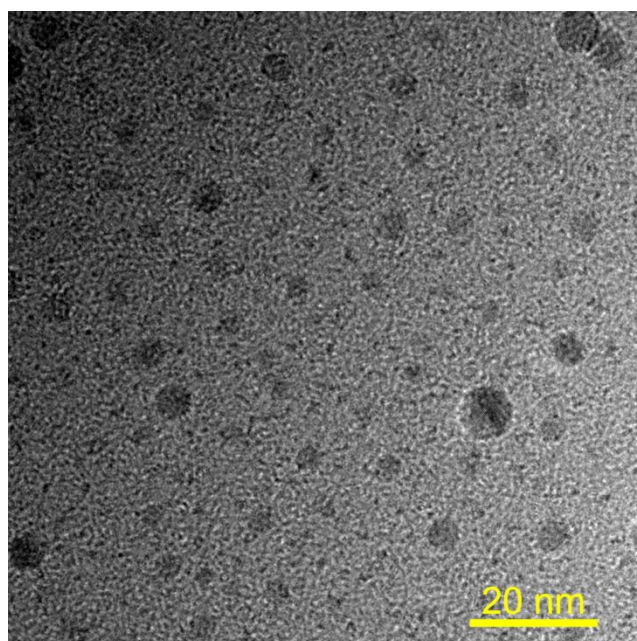**Figure S1.** TEM image of Cu nanoparticles in Cu/Cu<sub>2</sub>O/WO<sub>3</sub> sample.

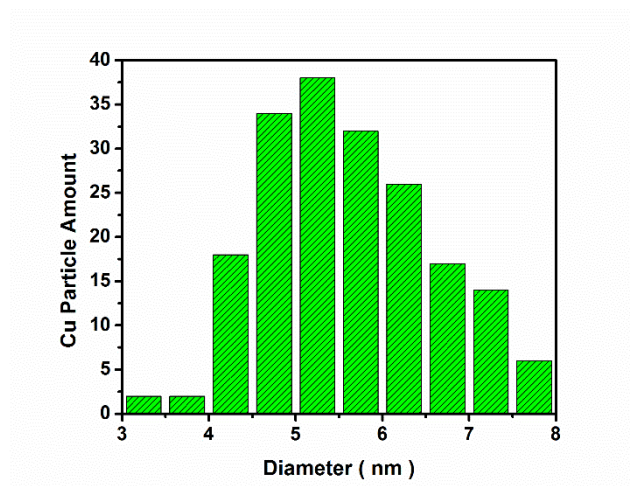

Figure S2. Size distribution histogram of Cu nanoparticles.

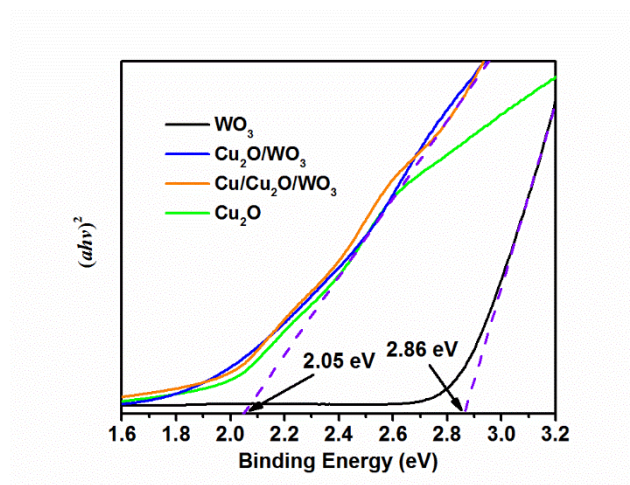

Figure S3. The curves of  $(\alpha h\nu)^2$  versus photo energy ( $h\nu$ ).

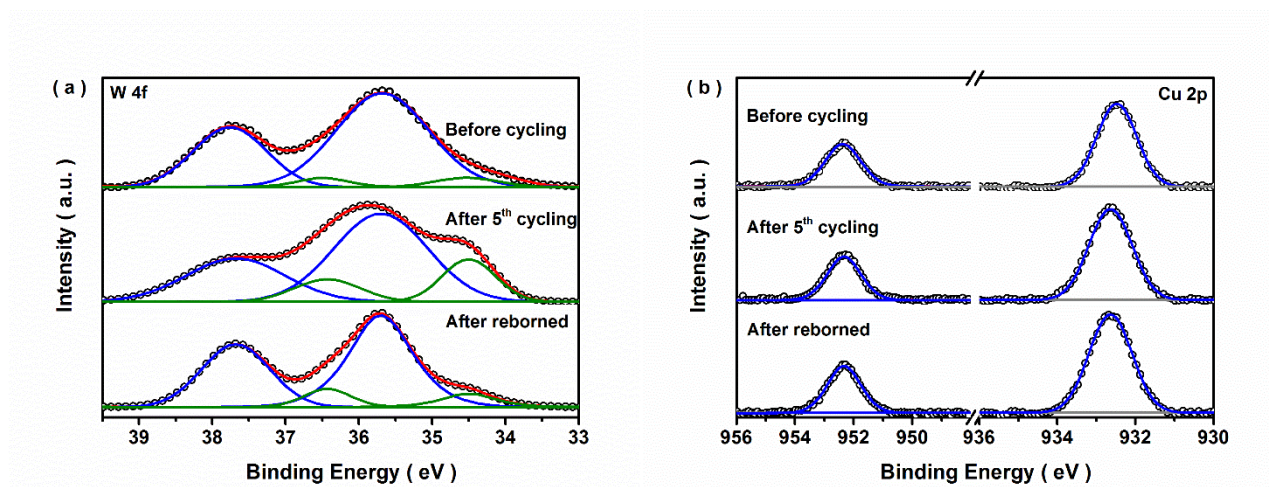

Figure S4. XPS spectra of Cu/Cu<sub>2</sub>O/WO<sub>3</sub> in the cycling tests (a) W 4f and (b) Cu 2p.
